# Supplementary material
Source: PubMed Central journal article supplement (PMC7511156)
Supplement: mmc2.pdf [file mmc2.pdf]

## ~WHAT-IF: Qualitative Study~

### Clinic Staff Focus Group Guide

**Introduction:** *This study is intended to understand your perspective regarding factors influencing the delivery of treatment for tobacco, alcohol and opioid use disorders through your HIV clinic. The goal of this study is to use your input, combined with that of patients, to inform the development of trainings, policies and procedures to improve how your clinic provides this treatment. Everything that is said here will be kept confidential and I will ask that others do the same. Nothing you say will impact your employment here. We will only share a summary of these findings with others so that we can try to improve your experiences and that of your patients. We ask that only one person speak at a time.*

*We would like to start by discussing your experiences in general with treating tobacco, alcohol or opioid use disorders for your patients.*

- 1. To get started, can you tell me generally about your understanding of how much there is a need for treatment of tobacco use disorders in your clinic? What about alcohol use disorders? And opioid use disorders?**

*Prompts*

- a. *To what extent do you think these addictions impact your patients?*

- 2. Can you tell me, what is your understanding of the evidence of treating tobacco use disorders among HIV-infected patients? What about alcohol use disorders? Opioid use disorders?**

*Prompts*

- a. *What type of evidence comes to mind? (Clinical trials, observational studies, guidelines)*
- b. *How relevant do you think this evidence is for your patients? What makes it more/less relevant for your patients?*
- c. *What motivates you to apply this evidence? What makes it hard to apply this evidence?*
- d. *What type of support do you have to apply this evidence?*

- 3. What about patients – what do you think patients know about this evidence? What do you think would help them apply this evidence to themselves?**

*Prompts*

- a. *How relevant do you think your patients see this evidence as applicable to them?*
- b. *What do you think impacts how patients apply this evidence to themselves?*

- 4. What about your clinic directors, administrators and those who pay for the care your patients receive – to what extent do you think they are aware of this evidence for treatment of tobacco use disorders? What about alcohol use disorders? Opioid use disorders?**

*Prompt*

- a. *How relevant do you think your clinical directors and administrators see this as an important issue?*
- b. *What do you think impacts how they prioritize this evidence?*
- c. *To what extent do you think treatment of tobacco, alcohol or opioid use disorders is measured as a performance status?*
- d. *What type of data are collected locally about your HIV-infected patients?*

**5. How do you think adopting evidence-based practices for the treatment of tobacco use disorders would impact your clinical practice? What about outcomes for your patients? And what about for alcohol use disorders? Tobacco use disorders?**

*Prompt*

- a. *What would make it hard to do this? What would make it easier to do this?*
- b. *How important do you think it is to do this in your clinic?*
- c. *What training would you need to do this?*
- d. *What systems would you need in place to do this?*
- e. *What types of staff changes would you need in your clinic to do this?*
- f. *What types of performance measures are currently in place? What kind of feedback do you get about this to inform your practice?*

**6. What types of resources do you currently have for addressing tobacco use disorders in your clinic? Alcohol use disorders? Opioid use disorders?**

*Prompt*

- a. *What would be the ideal system?*
- b. *What would you need to make that happen?*
- c. *How much support is there for such a change?*

## **~WHAT-IF: Qualitative Study~**

### **Patient Focus Group Guide**

**Introduction:** *This study is intended to understand your perspective regarding factors influencing the delivery of treatment for tobacco, alcohol and opioid use disorders through your HIV clinic. The goal of this study is to use your input, combined with that of providers, to inform the development of trainings, policies and procedures to improve how your clinic provides this treatment. Everything that is said here will be kept confidential and I will ask that others do the same. Nothing you say will impact the care you receive here. We will only share a summary of these findings with others so that we can try to improve your experiences and that of your providers. We ask that only one person speak at a time.*

*We would like to start by discussing your experiences in general with receiving treatment tobacco, alcohol or opioid use disorders.*

- 1. To get started, can you tell me generally about your understanding of how much there is a need for treatment of tobacco use disorders? What about alcohol use disorders? And opioid use disorders?**

*Prompts*

- a. To what extent do you think these addictions impact yourself or other people living with HIV?

- 2. Can you tell me, what is your understanding of the science regarding the relevance of treating tobacco use disorders among HIV-infected patients? What about alcohol use disorders? Opioid use disorders?**

*Prompts*

- a. What do you think makes this relevant for you or other people living with HIV?
- b. What do you think makes this less relevant for you or other people living with HIV?

- 3. What about your doctors or other health care providers – what do you think they know about this? How much do they talk to you about your tobacco use? Alcohol use? Opioid use?**

*Prompts*

- a. What kinds of conversations to you have about these issues?
- b. What about treatment?

- 4. What if you were to design a system for getting treatment for you or others living with HIV for a tobacco use disorder? Alcohol use disorder? Opioid use disorder?**

*Prompts*

- a. Who would provide that treatment?
- b. Where would you get that treatment?
- c. How open would you be to taking a medication?

- d. *What else would be helpful?*
- e. *What kind of information would you need?*
